# Supplementary material
Source: PubMed Central journal article supplement (PMC2905525)

**a**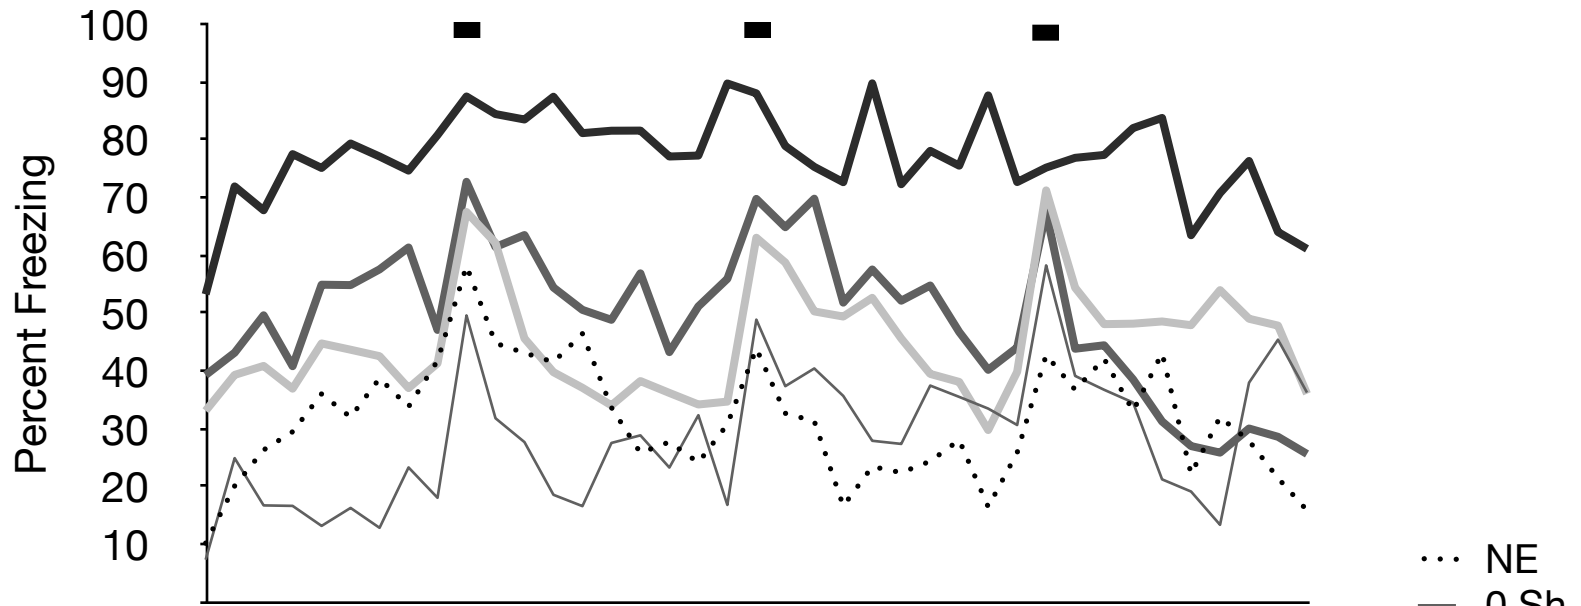**b**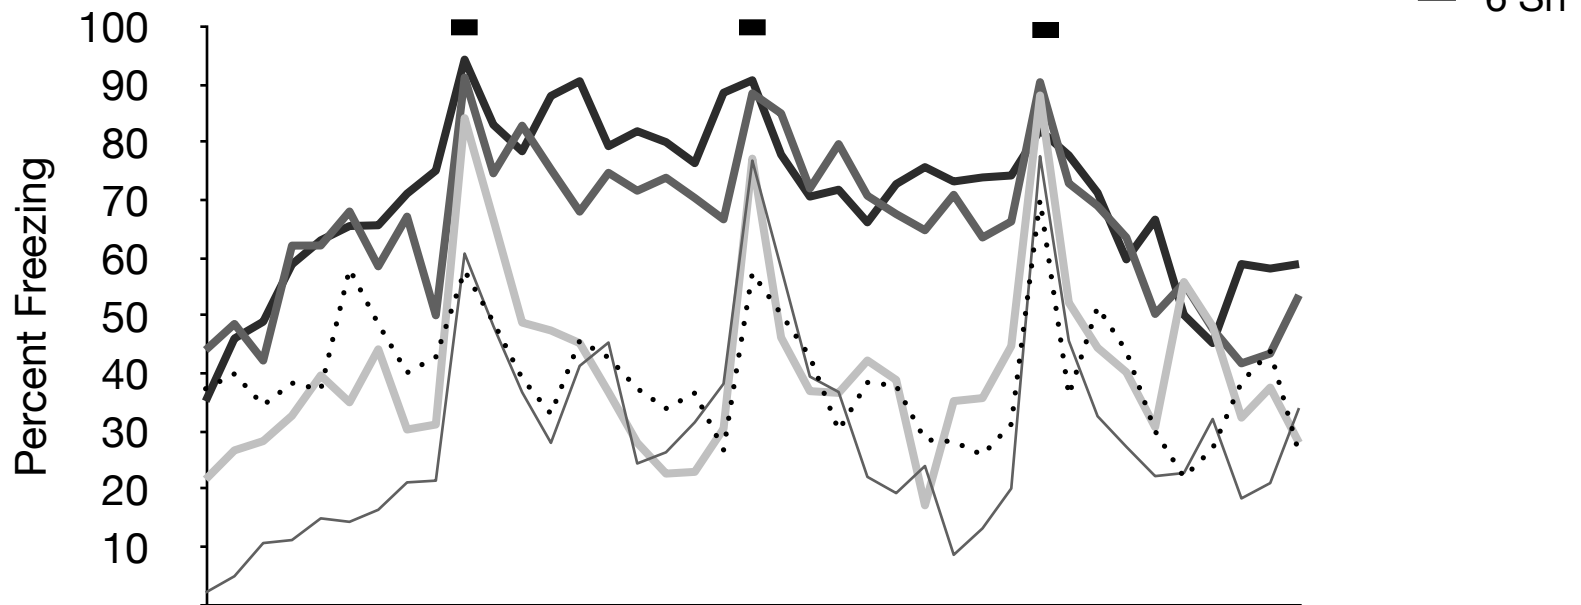

Supplement: NIHMS218629-supplement-01.pdf [file NIHMS218629-supplement-01.pdf]
